# Supplementary material for: Contrast-enhanced ultrasound Liver Imaging Reporting and Data System category M: a systematic review and meta-analysis
Source: PubMed Central journal article supplement — Ultrasonography. 2021 May 19;41(1):74–82. doi: 10.14366/usg.21011 (PMC8696144; doi:10.14366/usg.21011), 2021-05-19
Supplement: usg-21011-supple1.pdf [file usg-21011-supple1.pdf]

### Supplementary Table 1. Detailed search strategy for PICO

| Search strategy |                                                                                                                                            |
|-----------------|--------------------------------------------------------------------------------------------------------------------------------------------|
|                 | Ovid MEDLINE(R) Epub Ahead of Print, In-Process & Other Non-Indexed Citations, Ovid MEDLINE(R) Daily and Ovid MEDLINE(R) <1946 to Present> |
| 1               | "Liver Neoplasms" and "Radiology Information Systems" (554)                                                                                |
| 2               | ("liver imaging reporting and data system" or LI-RADS or LIRADS or LR-M or LRM).tw. (595)                                                  |
| 3               | 1 or 2 (1112)                                                                                                                              |
| 4               | "Contrast Enhanced Ultrasound".tw, (4366)                                                                                                  |
| 5               | (Ultrasound or "Contrast Enhanced US" or CEUS).tw. (245172)                                                                                |
| 6               | 4 or 5 (248802)                                                                                                                            |
| 7               | 3 and 6 (101)                                                                                                                              |
| 8               | 3 and 6 from 2016 to 2020 (71)                                                                                                             |
|                 | EMBASE Classic+ EMBASE <1947 to 2020 July 23>                                                                                              |
| 1               | 'liver imaging reporting and data system' (324)                                                                                            |
| 2               | LI-RADS or LIRADS or LR-M or LRM (977)                                                                                                     |
| 3               | 1 or 2 (1012)                                                                                                                              |
| 4               | 'Contrast Enhanced Ultrasound' (7779)                                                                                                      |
| 5               | (Ultrasound or 'Contrast Enhanced US' or CEUS) (502035)                                                                                    |
| 6               | 4 or 5 (502035)                                                                                                                            |
| 7               | 3 and 6 (122)                                                                                                                              |
| 8               | 3 and 6 from 2016 to 2020 (114)                                                                                                            |

PICO, patient, intervention, comparison, outcome; LI-RADS, Liver Imaging Reporting and Data System; LR-M, Liver Imaging Reporting and Data System category M; US, ultrasonography; CEUS, contrast-enhanced ultrasonography.
