# Supplementary material for: Contrast-enhanced ultrasound Liver Imaging Reporting and Data System category M: a systematic review and meta-analysis
Source: PubMed Central journal article supplement — Ultrasonography. 2021 May 19;41(1):74–82. doi: 10.14366/usg.21011 (PMC8696144; doi:10.14366/usg.21011), 2021-05-19
Supplement: usg-21011-supple2.pdf [file usg-21011-supple2.pdf]

**Supplementary Table 2. Excluded studies by full text review**

| Author                                                                                                   | Title                                                                                                                                                                                                                                     | Journal               | Year | Volume and page range |
|----------------------------------------------------------------------------------------------------------|-------------------------------------------------------------------------------------------------------------------------------------------------------------------------------------------------------------------------------------------|-----------------------|------|-----------------------|
| US LI-RADS                                                                                               |                                                                                                                                                                                                                                           |                       |      |                       |
| Banerjee I et al.                                                                                        | A scalable machine learning approach for inferring probabilistic US-LI-RADS categorization                                                                                                                                                | AMIA Annu Symp Proc   | 2018 | 2018:215–224          |
| Choi HH et al.                                                                                           | Association of advanced hepatic fibrosis and sonographic visualization score: a dual-center study using ACR US LI-RADS                                                                                                                    | Abdom Radiol          | 2019 | 44:1415–1422          |
| Millet JD et al.                                                                                         | ACR ultrasound liver reporting and data system: multicenter assessment of clinical performance at one year                                                                                                                                | J Am Coll Radiol      | 2019 | 16:1656–1662          |
| Son JH et al.                                                                                            | Validation of US Liver imaging Reporting and Data System version 2017 in patients at high risk for hepatocellular carcinoma                                                                                                               | Radiology             | 2019 | 292:390–397           |
| Kang JH et al.                                                                                           | US LI-RADS visualization score: diagnostic outcome of ultrasound-guided focal hepatic lesion biopsy in patients at risk for hepatocellular carcinoma                                                                                      | Ultrasonography       | 2020 | 40:167–175            |
| Not ACR CEUS LI-RADS                                                                                     |                                                                                                                                                                                                                                           |                       |      |                       |
| Schellhaas B et al.                                                                                      | LI-RADS-CEUS: proposal for a contrast-enhanced ultrasound Algorithm for the Diagnosis of Hepatocellular Carcinoma in High-Risk Populations                                                                                                | Ultraschall Med       | 2016 | 37:627–634            |
| Study included patients who do not meet CEUS LI-RADS high-risk                                           |                                                                                                                                                                                                                                           |                       |      |                       |
| Li F et al.                                                                                              | Distinguishing intrahepatic cholangiocarcinoma from hepatocellular carcinoma in patients with and without risks: the evaluation of the LR-M criteria of contrast-enhanced ultrasound liver imaging reporting and data system version 2017 | Eur Radiol            | 2020 | 30:461–470            |
| Insufficient data on the calculation of probability of CEUS LR-M category for HCC and non-HCC malignancy |                                                                                                                                                                                                                                           |                       |      |                       |
| Chen LD et al.                                                                                           | Differentiation of intrahepatic cholangiocarcinoma from hepatocellular carcinoma in high-risk patients: a predictive model using contrast-enhanced ultrasound                                                                             | World J Gastroenterol | 2018 | 24:3786–3798          |
| Schellhaas B et al.                                                                                      | Interobserver and intermodality agreement of standardized algorithms for non-invasive diagnosis of hepatocellular carcinoma in high-risk patients: CEUS-LI-RADS versus MRI-LI-RADS                                                        | Eur Radiol            | 2018 | 28:4254–4264          |
| Schellhaas B et al.                                                                                      | Interobserver agreement for contrast-enhanced ultrasound (CEUS)-based standardized algorithms for the diagnosis of hepatocellular carcinoma in high-risk patients                                                                         | Ultraschall Med       | 2018 | 39:667–674            |
| Hu J et al.                                                                                              | Resolution of indeterminate MRI with CEUS in patients at high risk for hepatocellular carcinoma                                                                                                                                           | Abdom Radiol          | 2020 | 45:123–133            |
| Kang HJ et al.                                                                                           | Additional value of contrast-enhanced ultrasound (CEUS) on arterial phase non-hyperenhancement observations ( $\geq 2$ cm) of CT/MRI for high-risk patients: focusing on the CT/MRI LI-RADS categories LR-3 and LR-4                      | Abdom Radiol          | 2020 | 45:55–63              |
| Schellhaas B et al.                                                                                      | Contrast-enhanced ultrasound algorithms (CEUS-LIRADS/ESCUAP) for the noninvasive diagnosis of hepatocellular carcinoma: a prospective multicenter DEGUM study                                                                             | Ultraschall Med       | 2021 | 42:178–186            |
| Wang JY et al.                                                                                           | Usefulness of the contrast-enhanced ultrasound Liver Imaging Reporting and Data System in diagnosing focal liver lesions by inexperienced radiologists                                                                                    | J Ultrasound Med      | 2020 | 39:1537–1546          |
| Wang JY et al.                                                                                           | Comparison of contrast-enhanced ultrasound versus contrast-enhanced magnetic resonance imaging for the diagnosis of focal liver lesions using the Liver Imaging Reporting and Data System                                                 | Ultrasound Med Biol   | 2020 | 46:1216–1223          |

US, ultrasound; LI-RADS, Liver Imaging Reporting and Data System; ACR, American College of Radiology; CEUS, contrast-enhanced ultrasound; LR-M, LI-RADS category M; HCC, hepatocellular carcinoma; MRI, magnetic resonance imaging; CT, computed tomography; ESCULAP, Erlanger Synopsis for Contrast-enhanced Ultrasound for Liver lesion Assessment in Patients at risk.

**Supplementary Table 3. Meta-analytic summary frequency of CEUS LR-M imaging features for HCC and non-HCC malignancy**

|                       | Rim arterial phase hyperenhancement |                    | Early (<60 s) washout |                    | Marked washout |                    |
|-----------------------|-------------------------------------|--------------------|-----------------------|--------------------|----------------|--------------------|
|                       | HCC                                 | Non-HCC malignancy | HCC                   | Non-HCC malignancy | HCC            | Non-HCC malignancy |
| Meta-analytic summary | 1 (0–1)                             | 30 (17–45)         | 15 (7–26)             | 79 (66–90)         | 3 (2–6)        | 42 (21–64)         |

Values are presented as percentage of each imaging feature (95% confidence interval).

CEUS, contrast-enhanced ultrasound; LR-M, Liver Imaging Reporting and Data System category M; HCC, hepatocellular carcinoma.
