# Supplementary material for: Contrast-enhanced ultrasound Liver Imaging Reporting and Data System category M: a systematic review and meta-analysis
Source: PubMed Central journal article supplement — Ultrasonography. 2021 May 19;41(1):74–82. doi: 10.14366/usg.21011 (PMC8696144; doi:10.14366/usg.21011), 2021-05-19
Supplement: usg-21011-supple3.pdf [file usg-21011-supple3.pdf]

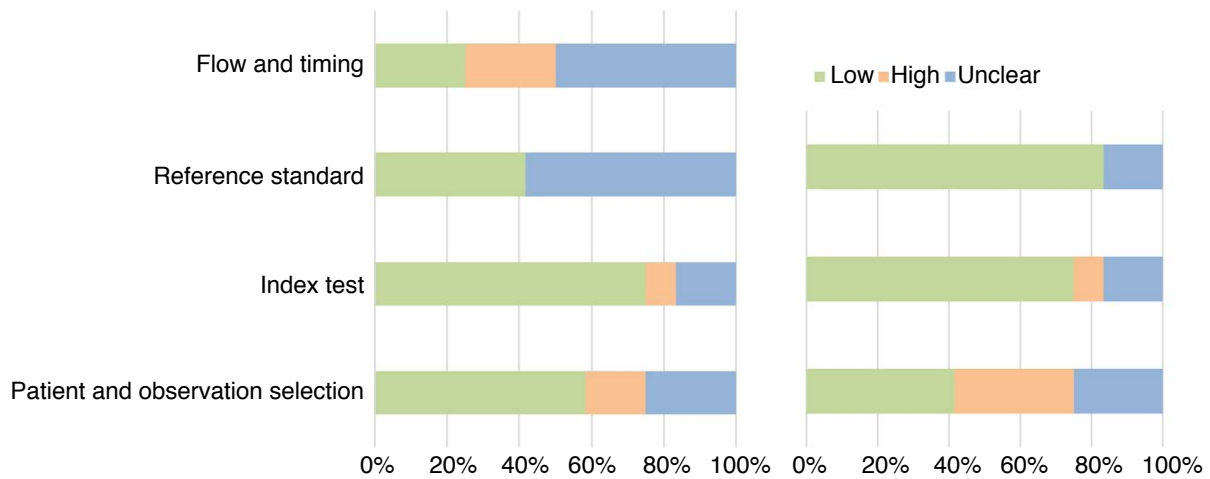

**Supplementary Fig. 1.** Methodological quality of the studies with the Quality Assessment of Diagnostic Accuracy Studies (QUADAS)-2. The results of the included studies in terms of the risk of bias (left) and concerns regarding applicability (right) according to each QUADAS-2 domain.

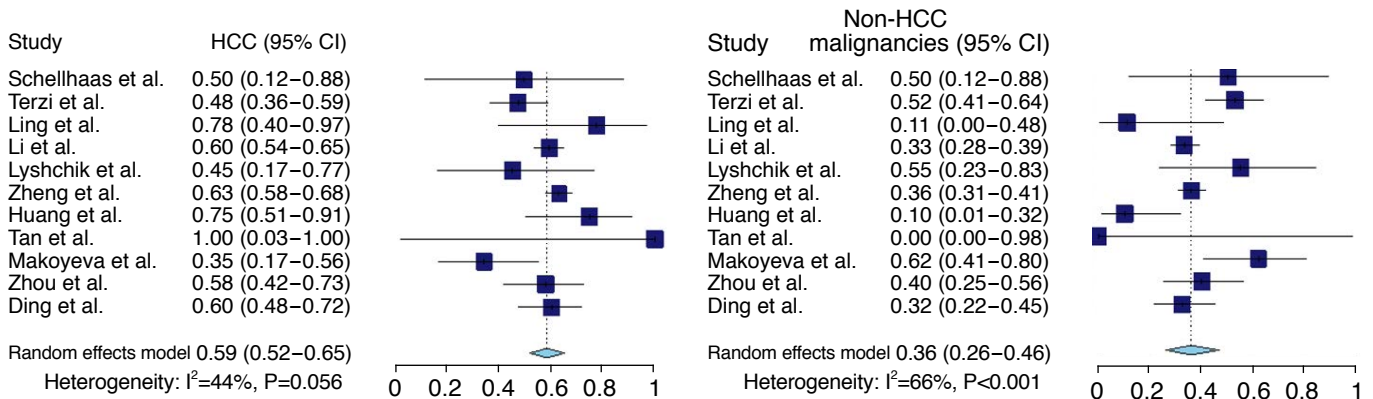

**A** **B**  
**Supplementary Fig. 2.** Subgroup analysis of the pooled proportions of HCC and non-HCC malignancy in the CEUS LR-M category using cohort studies. HCC, hepatocellular carcinoma; CI, confidence interval; CEUS, contrast-enhanced ultrasound; LR-M, Liver Imaging Reporting and Data System category M.

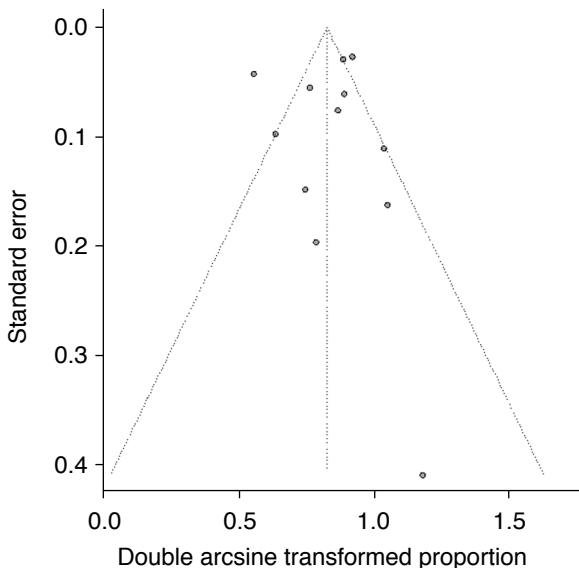

**Supplementary Fig. 3.** Funnel plot for publication bias.
